# Supplementary material
Source: PubMed Central journal article supplement (PMC7616241)
Supplement: EMS197468-supplement-Supplementary_materials.pdf [file EMS197468-supplement-Supplementary_materials.pdf]

## Supplementary Materials

El Morr et al, Figure S1

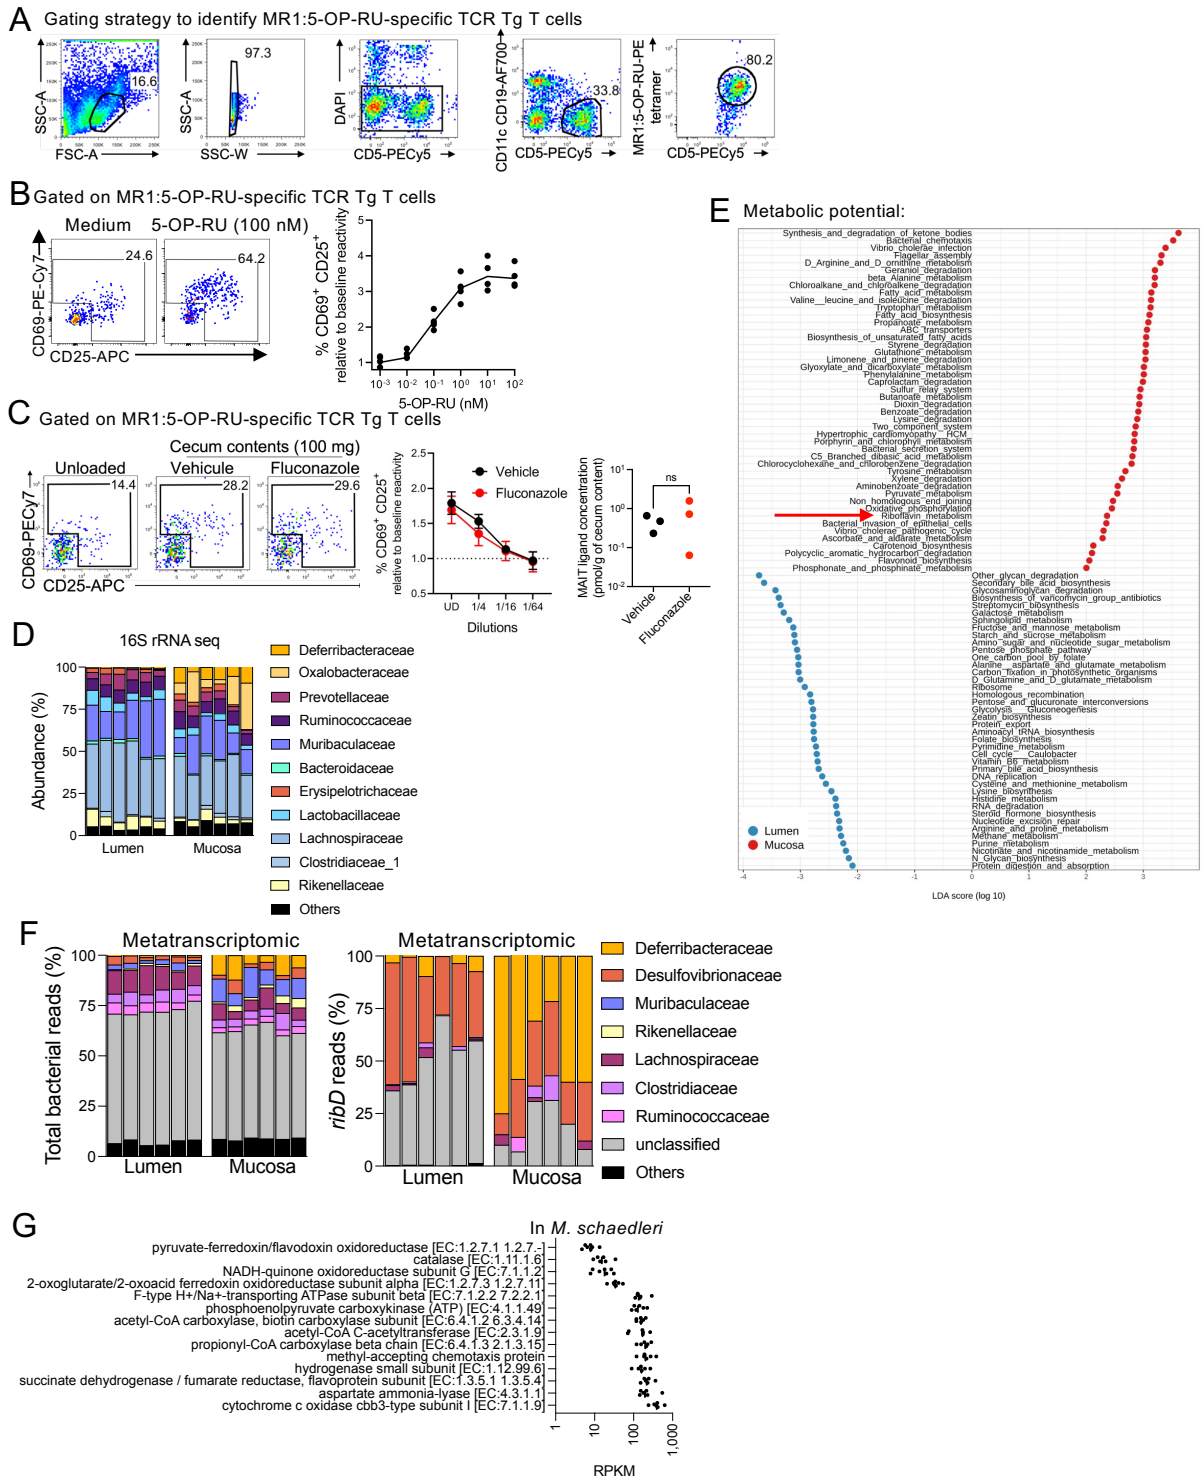

**Figure S1: Bacterial production of MAIT antigens in the colonic mucosa.** **A.** Gating strategy used to identify 5-OP-RU-specific TCR Tg T cells after co-culture with WT3-MR1 cells pulsed with intestinal contents. **B.** Left: Activation of MR1:5-OP-RU-specific TCR Tg T cells after overnight incubation with WT3-MR1 cells pulsed with 5-OP-RU (100 nM). Right: Relative expression of CD25 and CD69 by 5-OP-RU-specific TCR Tg T cells in the indicated conditions (data pooled from three independent experiments). **C.** Left: Activation of 5-OP-RU-specific TCR Tg T cells after overnight incubation with WT3-MR1 cells unloaded or pulsed with 100 mg of luminal contents from the cecum of control (vehicle) or of mice treated for 7d with fluconazole. Right: Relative expression of CD25 and CD69 by 5-OP-RU-specific TCR Tg T cells in the indicated conditions (means  $\pm$  SEMs, n = 3 mice per group). The dotted line indicates baseline reporter T cell activation in absence of intestinal contents. MAIT antigen concentrations as estimated using a standard curve with synthetic 5-OP-RU. Data from 1 experiment. **D.** Abundance of the indicated bacterial *Families* in the cecum lumen and mucosa based on 16S rRNA gene sequencing (columns indicate individual mice). **E.** Pathway enrichment analysis using PICRUSt-predicted KEGG orthologs between the lumen and mucosal niches in the cecum. Significance in pathway enrichment was tested using LEfSe analysis. **F.** Taxonomy of total (left) and *ribD* (right) bacterial reads at the *Family* level. **G.** Normalized counts (Reads per Kb per million) of the indicated genes expressed by *M. schaedleri* in the mucosa.

El Morr et al, Figure S2

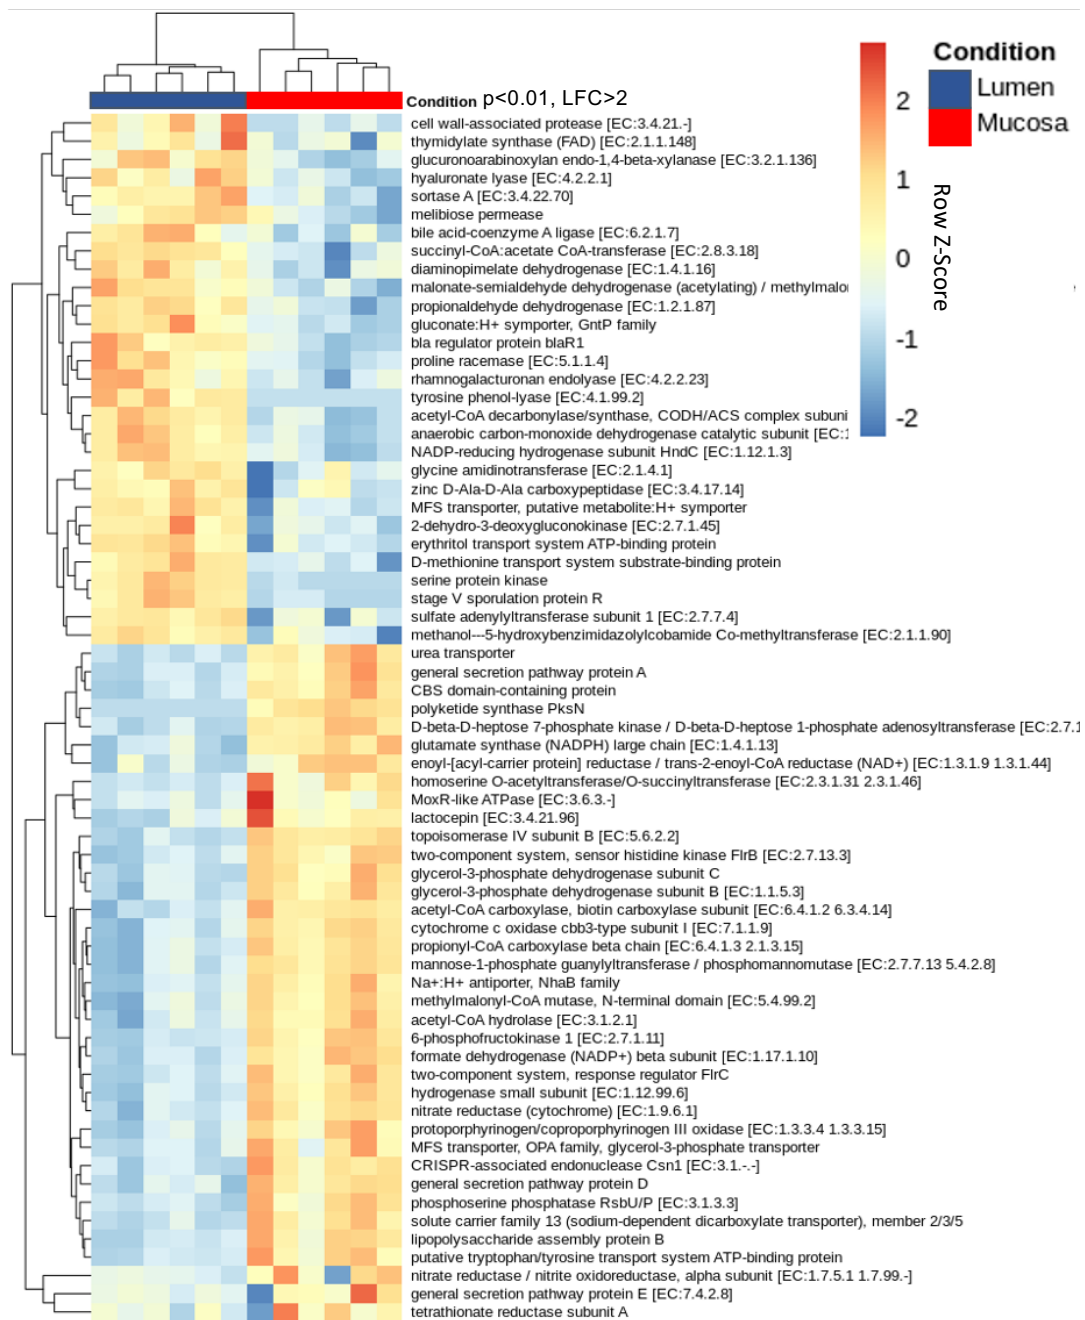

**Figure S2: Bacterial gene expression in lumen and mucosa.** Heatmap showing the top differentially expressed bacterial genes between the lumen and mucosal niches of the cecum (adjusted  $p < 0.01$  by Mann-Whitney  $U$  test,  $LFC > 2$ ).

El Morr et al, Figure S3

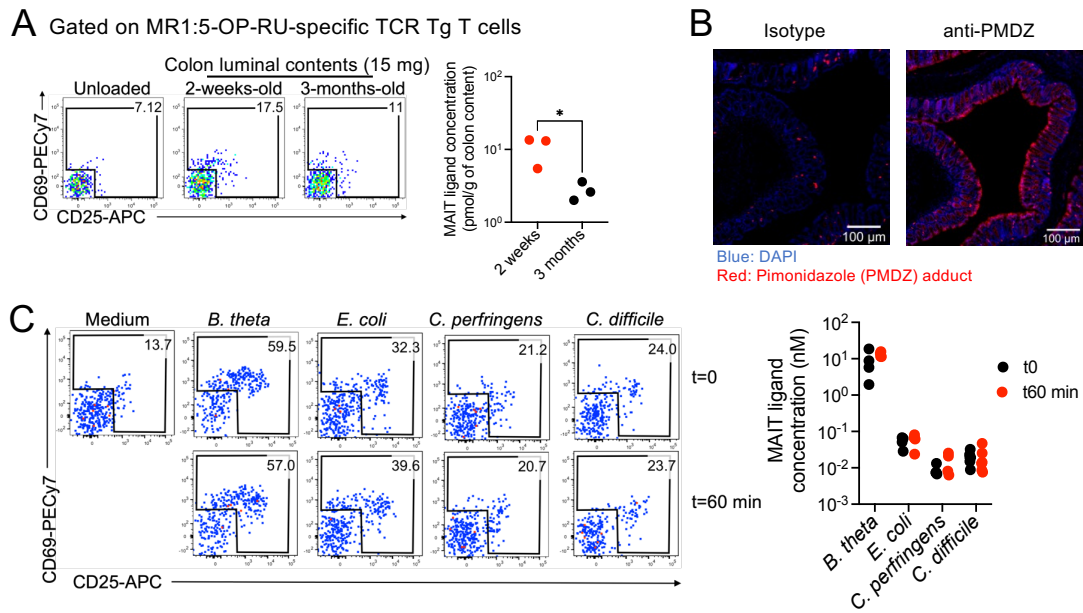

**Figure S3: MAIT ligand production upon bacterial exposure to air.** **A.** Left: Activation of MR1:5-OP-RU-specific TCR Tg T cells after overnight incubation with WT3-MR1 cells unloaded or pulsed with luminal contents from the colon of mice at the indicated age. Right: Summary of the results. MAIT antigen concentrations were estimated using a standard curve with synthetic 5-OP-RU. Data from 1 experiment. \* $p < 0.05$  by unpaired Student's  $t$  test. **B.** Representative images of the colon from a naive mouse stained with control or anti-PMDZ antibody (red). DNA staining with DAPI is shown in blue. Representative of 3 independent experiments. **C.** Left: Activation of MR1:5-OP-RU-specific TCR Tg T cells after overnight incubation with WT3-MR1 cells unloaded or pulsed with filtered bacterial culture supernatants. Bacteria were grown anaerobically until late exponential growth phase prior to exposure to air at 37°C for 1h. Right: MAIT antigen concentration in the indicated conditions, estimated using a standard curve of synthetic 5-OP-RU. Data pooled from 2 independent experiments.

El Morr et al, Figure S4

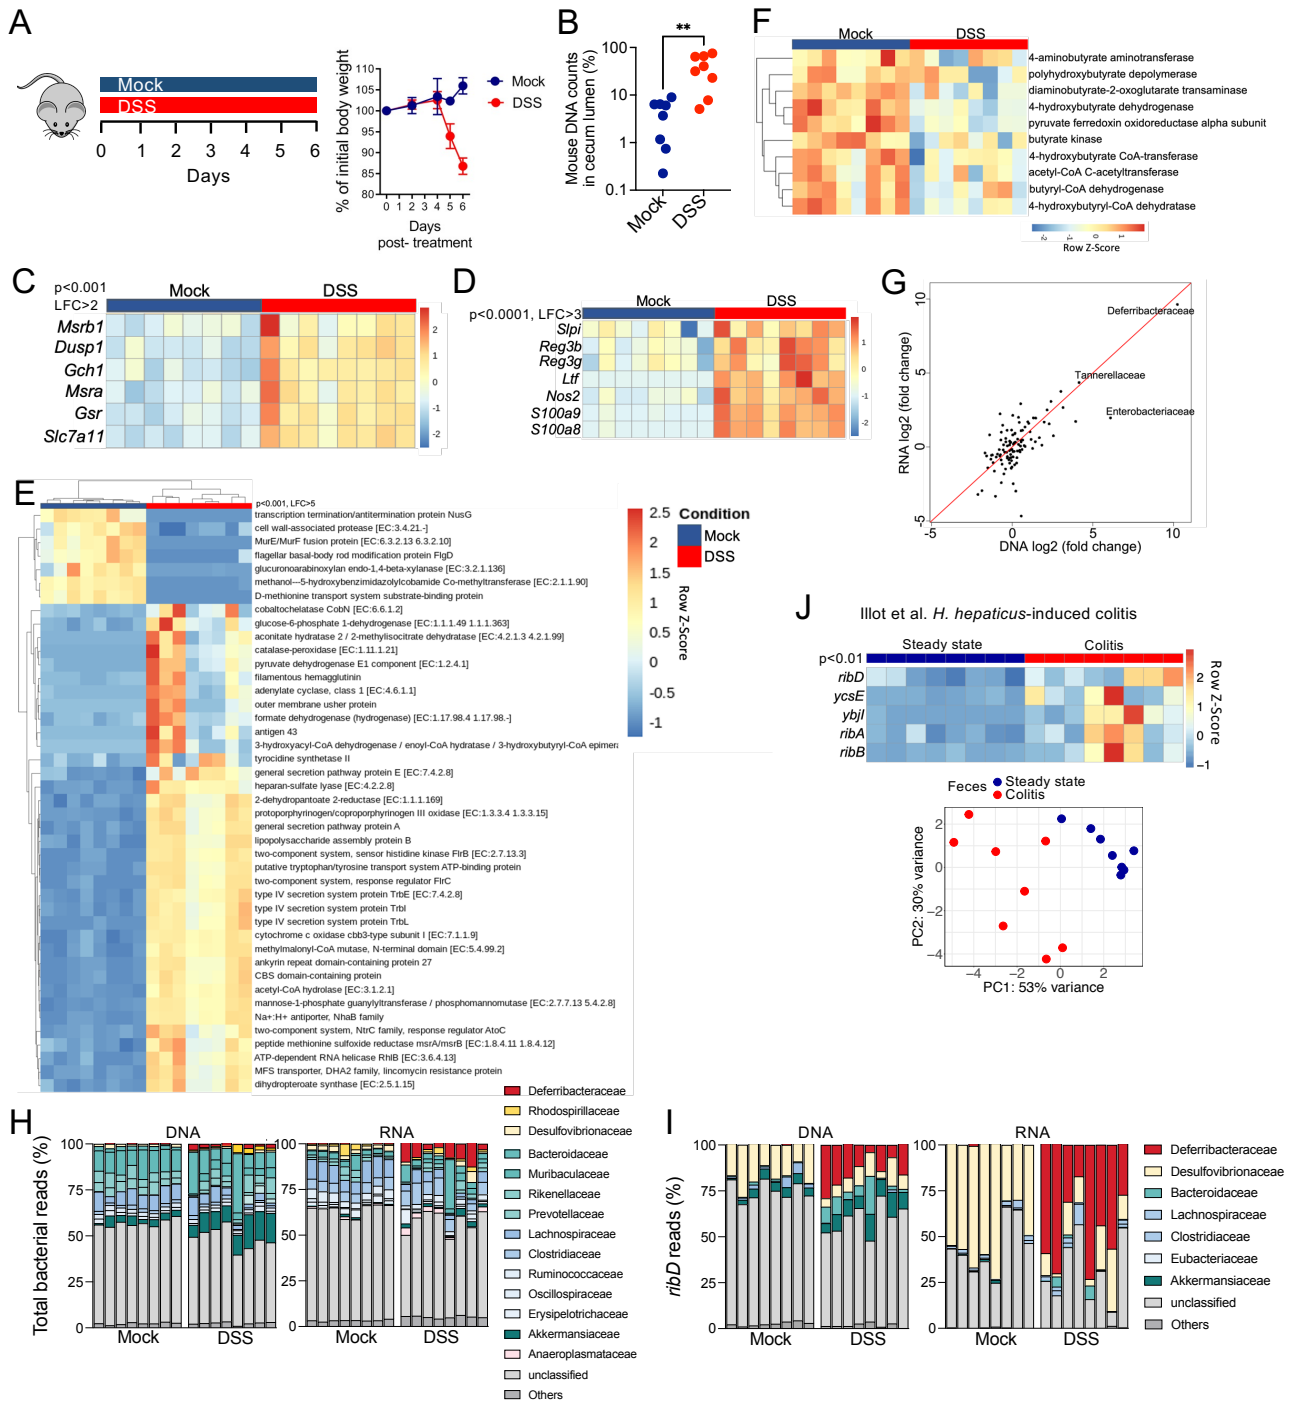

**Figure S4: Bacterial gene expression in response to DSS-induced colitis.** **A.** Left: Scheme of the acute DSS model of colitis. Right: Mouse weight as percentage of initial body weight (means  $\pm$  SEMs,  $n=6$  mice per group). Representative of 3 independent experiments. **B.** Percentage of cecal DNA reads aligned to the mouse genome in the indicated mice. \*\* $p < 0.01$  by unpaired Mann-Whitney  $U$  test. **C.** Heatmap showing mouse genes with oxidative stress resistance function found up-regulated ( $p < 0.001$  by Mann-Whitney  $U$  test; LFC  $> 2$ ) in the cecum lumen during colitis. **D.** Heatmap showing mouse genes with anti-bacterial functions found over-expressed (adjusted  $p < 0.0001$  by Wald test, LFC  $> 3$ ) in the cecum lumen during colitis. **E.** Heatmap showing the top differentially expressed bacterial genes in the cecum lumen between control (mock) and DSS-treated mice (padj  $< 0.001$  by Mann-Whitney  $U$  test, LFC  $> 5$ ). **F.** Heatmap showing expression of the bacterial genes involved in butyrate metabolism in mock- and DSS-treated mice. **G.** Correlation of fold changes between metagenomic and metatranscriptomic analyses. The red line represents the linear model fit. **H.** Family-level taxonomy of total bacterial DNA (left) or RNA (right) reads from the cecum of the indicated mice. **I.** Family-level taxonomy of *ribD* DNA (left) or RNA (right) reads from the cecum of the indicated mice. **J.** Top: Heatmap showing the genes of the riboflavin biosynthetic pathway found up-regulated in the feces upon colitis induction (padj  $< 0.01$  by Mann-Whitney  $U$  test). Bottom: Principal component analysis (PCA) of the riboflavin biosynthesis pathway genes expressed in the feces before (steady state, blue) or after *Helicobacter hepaticus*-induced colitis (red) ( $n = 8$  mice).

El Morr et al, Figure S5

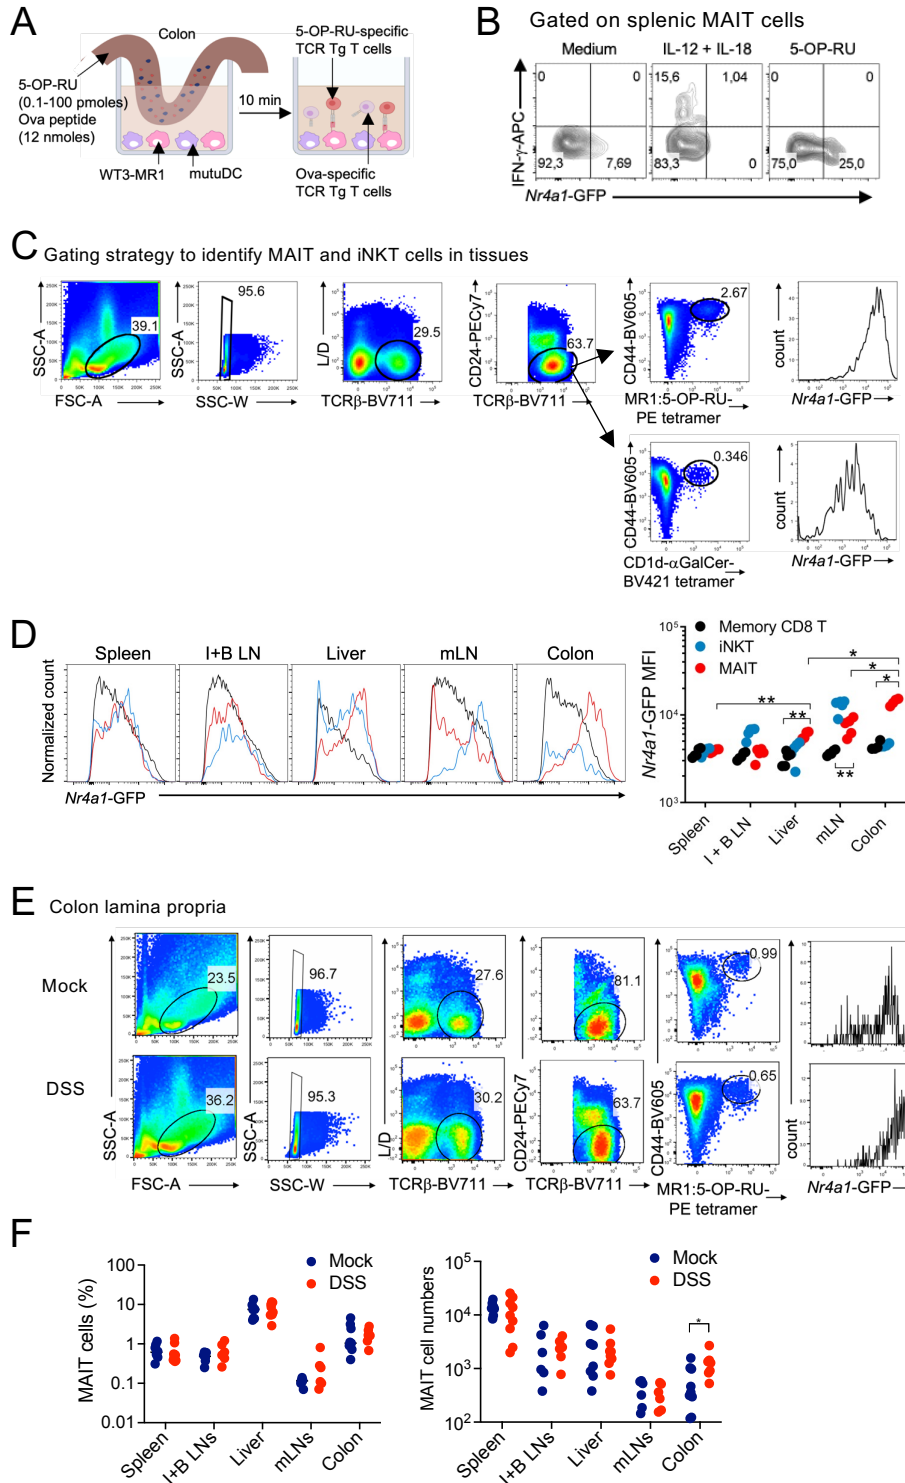

**Figure S5: Nur77 expression in MAIT cells at steady-state and upon DSS-induced colitis.** **A.** Scheme of the assay used to assess intestinal permeability to ligands. The ligand mixture deposited in the lumen contained a fixed amount of Ova peptide and variable amounts of 5-OP-RU. **B.** Interferon (IFN)- $\gamma$  and *Nr4a1*-GFP expression in splenic MAIT cells untreated or incubated overnight with interleukin (IL)-12 (10 ng/ml) and -18 (12.5 ng/ml) or with WT3-MR1 cells pulsed with 5-OP-RU (10 nM). MAIT cells were identified using MR1:5-OP-RU tetramer. Data from 1 experiment. **C.** Gating strategy used to identify MAIT and iNKT cells in tissues, here in colon lamina propria. Representative of at least 8 independent experiments. **D.** Left: *Nr4a1*-GFP expression in the indicated T cell subsets and tissues; representative of at least 3 independent experiments. I+B LN: pooled inguinal and brachial lymph nodes. mLN: pooled mesenteric lymph nodes. Right: Mean fluorescence intensity (MFI) in the indicated cell subsets and tissues ( $n = 4$  mice; representative of at least 3 independent experiments). **E.** Gating strategy used to identify MAIT cells in the colon lamina propria of Mock- and DSS-treated mice. Data representative of 3 independent experiments. **F.** MAIT cell frequencies (left) and numbers (right) in the indicated tissues of mice treated with DSS for 7d. Data pooled from 3 independent experiments. \* $p < 0.05$  and \*\* $p < 0.01$  by Mann-Whitney  $U$  tests.

El Morr et al, Figure S6

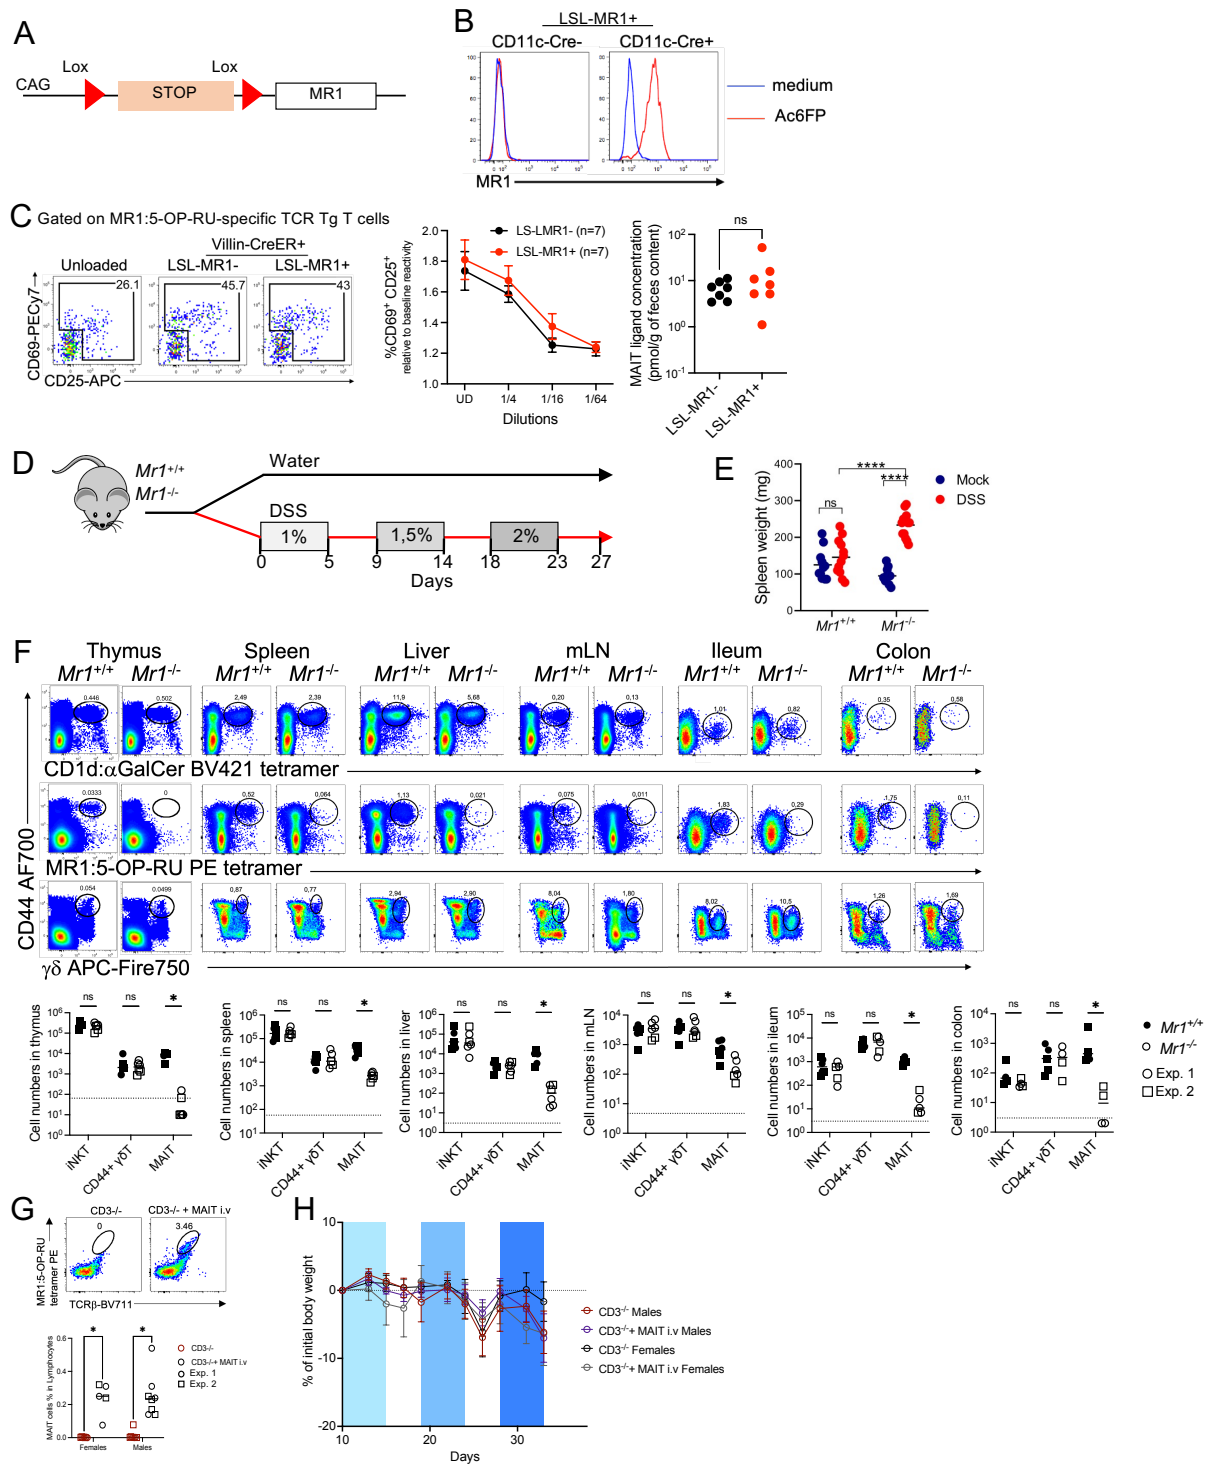

**Figure S6: *Mr1*<sup>-/-</sup> mice are more sensitive to chronic DSS-induced colitis.** **A.** Scheme of the lox-stop-lox-MR1 transgenic construct. **B.** Surface MR1 expression on splenic CD11c<sup>+</sup> MHCII<sup>+</sup> dendritic cells from LSL-MR1<sup>+</sup> CD11c-Cre- or LSL-MR1<sup>+</sup> CD11c-Cre+ mice after overnight incubation with Ac6-F6P (10 μM). Representative of 2 independent experiments. **C.** Left: Activation of MR1:5-OP-RU-specific TCR Tg T cells after overnight incubation with WT3-MR1 cells unloaded or pulsed with 100 mg of feces from the indicated mice. Both LSL-MR1<sup>+</sup> and LSL-MR1<sup>-</sup> mice were crossed to the VillinCreER mouse and received tamoxifen injections. Right: MAIT antigen concentrations in feces estimated using synthetic 5-OP-RU. n=7 mice per group, data from 1 experiment. **D.** Scheme of the chronic DSS-induced colitis model used to assess disease severity in *Mr1*<sup>+/+</sup> and *Mr1*<sup>-/-</sup> mice. **E.** Spleen weight in the indicated mice with chronic colitis. n=12-13 mice per group; data pooled from 3 independent experiments. ns ≥ 0.05, \*p < 0.05, \*\*p < 0.01 and \*\*\*\*p < 0.0001 by Student's *t* tests. **F.** Top: Representative flow cytometry dotplots showing identification of iNKT, MAIT and γδ T cells (defined as TCRβ<sup>+</sup> γδTCR<sup>+</sup> CD44<sup>+</sup>) in the indicated tissues of B6-MAIT<sup>Cast</sup> *Mr1*<sup>-/-</sup> and *Mr1*<sup>+/+</sup> mice. Data are representative of two independent experiments. Bottom: iNKT, MAIT and γδ T cell numbers in the indicated tissues. ns ≥ 0.05, \*p < 0.05, \*\*p < 0.01 and \*\*\*\*p < 0.0001 by multiple Mann-Whitney tests. Pooled data from 2 independent experiments. Dotted lines indicate the limit of quantification for each tissue. **G.** Top: Representative flow cytometry showing tetramer+ cells in the spleen of CD3ε<sup>-/-</sup> mice engrafted with *in vitro*-expanded MAIT cells. Cells were gated on live CD45<sup>+</sup> CD19<sup>-</sup> CD11c<sup>+</sup> cells. Bottom: Summary of the data pooled from 2 independent experiments, represented as percentage among live cells. **H.** Body weight of control and recipient CD3ε<sup>-/-</sup> mice. Data pooled from 2 independent experiments.

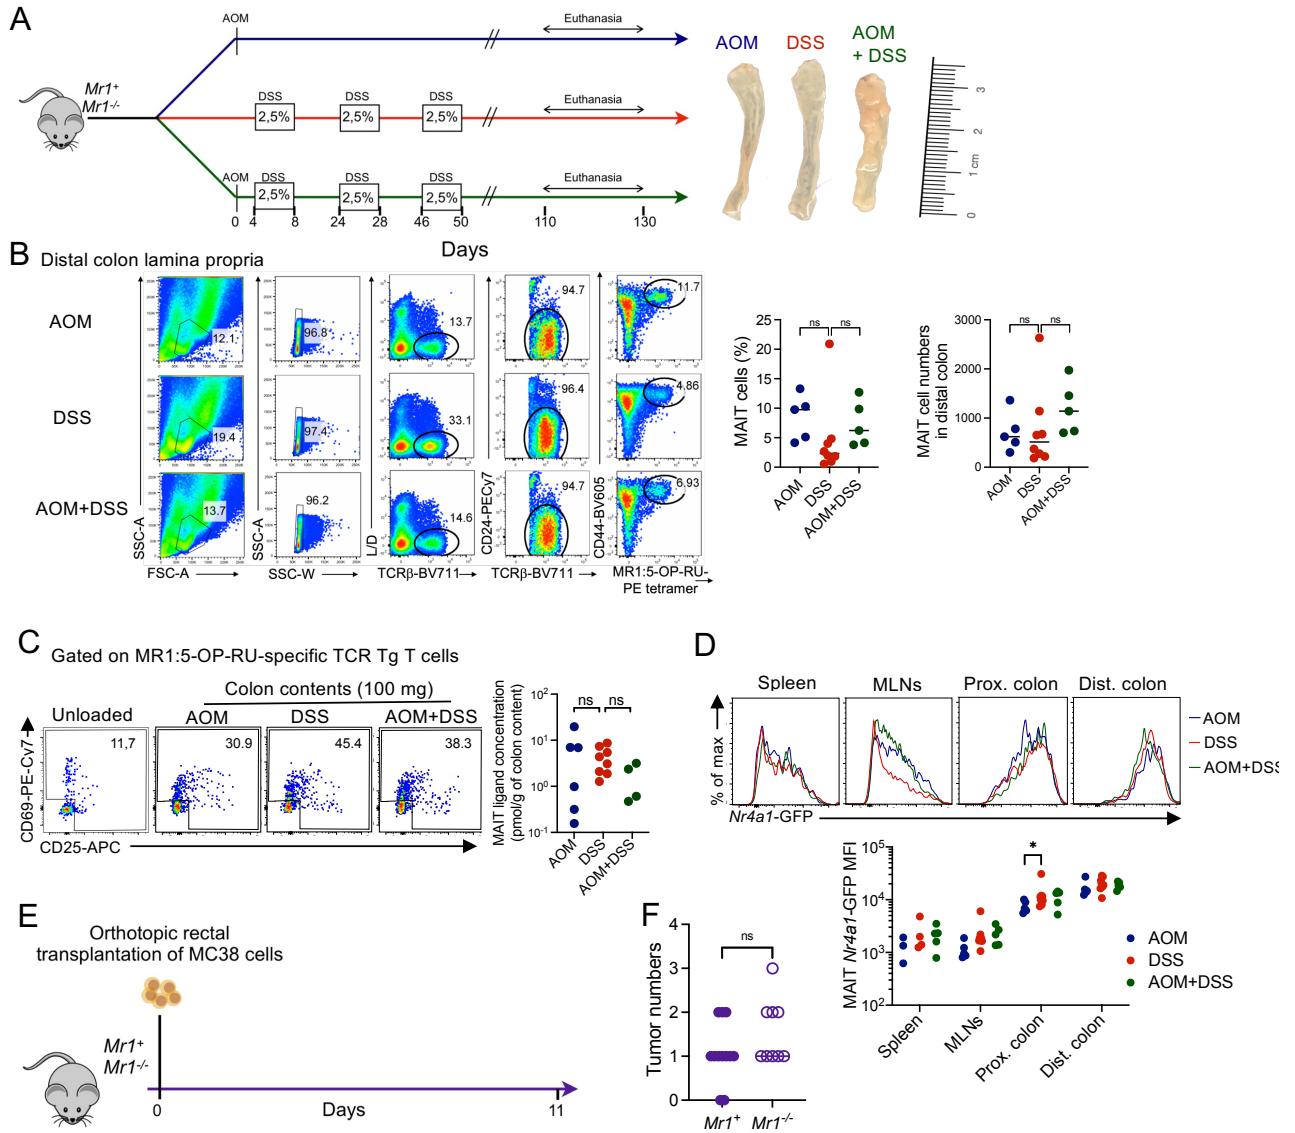

**Figure S7: *Mr1*<sup>-/-</sup> mice develop more rectal tumors in the AOM/DSS colitis-induced colorectal tumor model.** **A.** Left: Scheme of the AOM/DSS model of inflammation-induced colorectal cancer. Right: Representative images of the distal colon of WT mice at the end of the indicated protocol. Representative of 3 independent experiments. **B.** Left: Gating strategy used to identify MAIT cells in the distal colon lamina propria of the indicated B6-MAIT<sup>Cast</sup> mice. Data representative of 2 independent experiments. Right: MAIT cell frequencies and numbers in the distal colon of the indicated B6-MAIT<sup>Cast</sup> mice. Results are pooled from 2 independent experiments. **C.** Left: Activation of reporter T cells after incubation with WT3-MR1 cells unloaded or pulsed with 100 mg of colon contents from indicated mice. Right: MAIT antigen concentration in the indicated conditions as estimated using synthetic 5-OP-RU. Pooled data from 2 independent experiments. n=4-8 mice per group. **D.** Top: *Nr4a1*-GFP expression in MAIT cells from the indicated tissues. Bottom: Data pooled from 2-3 independent experiments. **E.** Scheme of the orthotopic colorectal tumor model. **F.** Tumor numbers in the rectum of the indicated mice 11d after orthotopic rectal injection of MC38 cells. Pooled data from 2 independent experiments. ns p $\geq$  0.05 by ANOVA (C) or by Student's *t* test (B, F), \*p<0.05 by Mann-Whitney test (D).



A

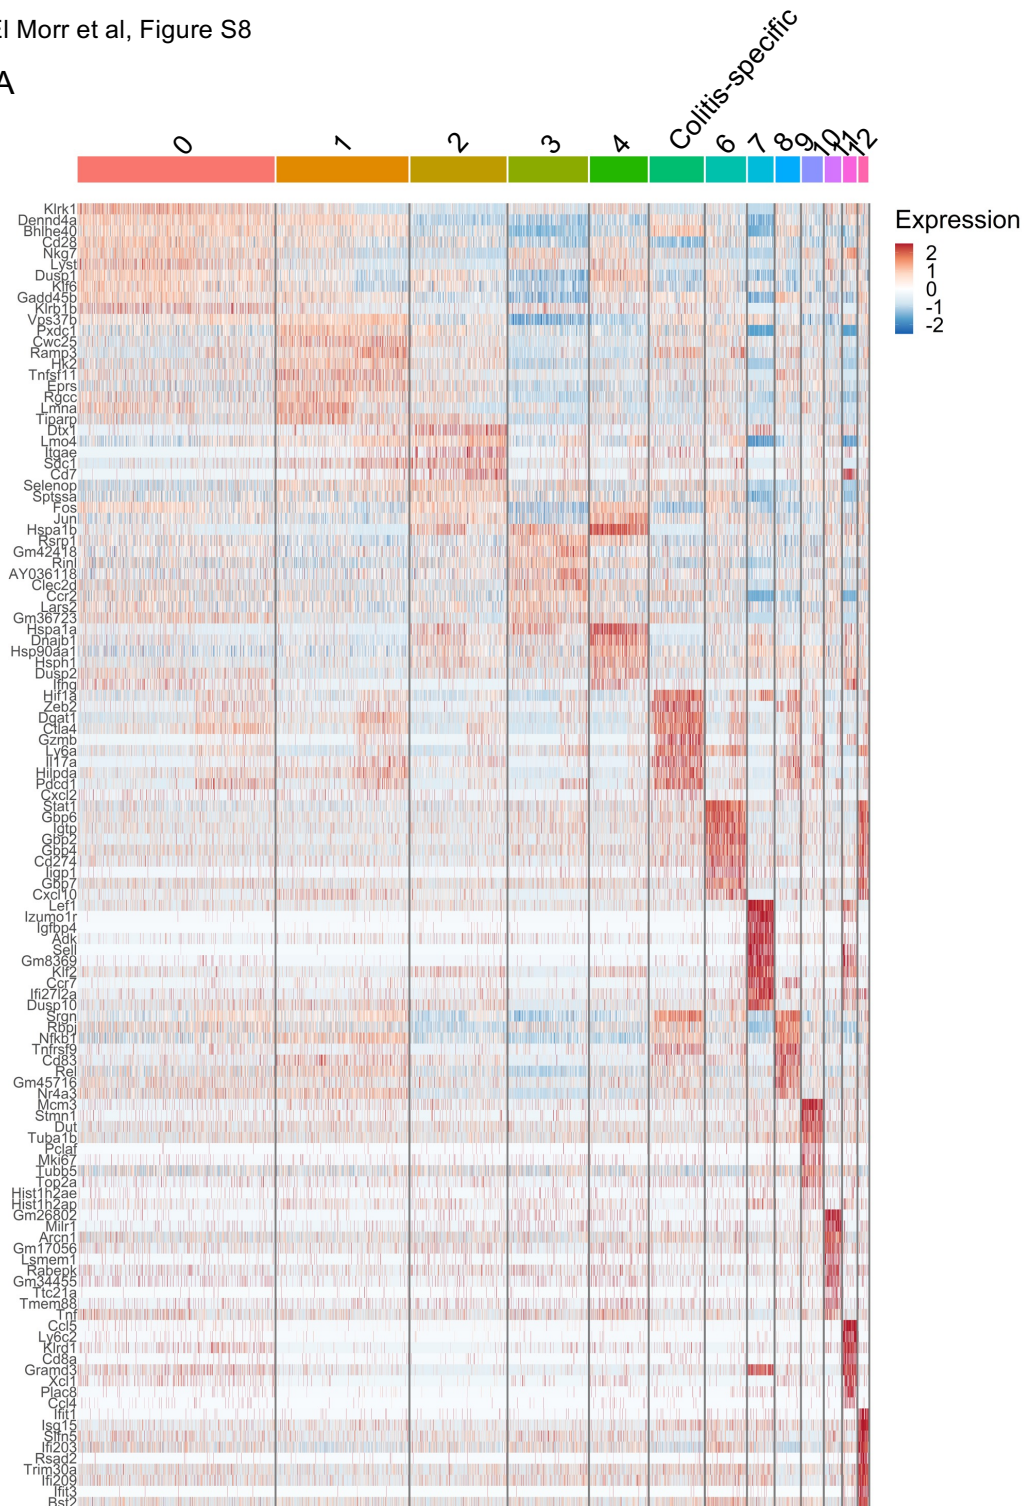

B

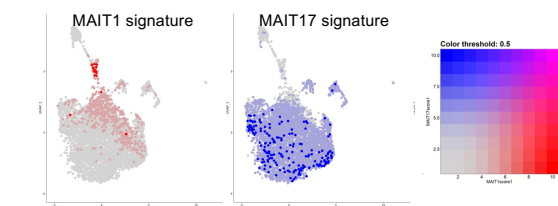

**Figure S8: Gene expression in colonic MAIT cells upon colitis. A.** Heatmap showing the 10 most differentially expressed genes in cells from the indicated clusters. Colonic MAIT cells isolated from the colon of AOM- or DSS-treated mice were analyzed by single-cell RNAseq. Cells from both conditions were integrated using default Seurat integration parameters and were analyzed jointly using 30 principal components and a clustering resolution of 0.8. **B.** Expression of a MAIT1 (red) and a MAIT17 (blue) gene signature by colonic MAIT cells. The signatures were defined by bulk analysis of thymic MAIT1 and MAIT17 cells in Legoux et al, Nat. Immunol 2019.
